1 **Study Title:** Risk of Delayed Percutaneous Coronary Intervention for STEMI in the Southeast  
2 United States

3 **Short Running Title:** Risk of delayed PCI for STEMI in the Southeast US

4 **Author List:** Maxwell C. Messinger, MS<sup>1,2</sup>; Nicklaus P. Ashburn, MD, MS<sup>1</sup>; Joshua S. Chait,  
5 MD<sup>1,3</sup>; Anna C. Snavely PhD<sup>1,4</sup>; Siena Hapig-Ward, MD<sup>1,5</sup>; Jason P. Stopyra, MD, MS<sup>1</sup>; Simon  
6 A. Mahler MD, MS<sup>1,6,7</sup>

7 Author Affiliations:

8 <sup>1</sup> Department of Emergency Medicine, Wake Forest University School of Medicine, Winston-  
9 Salem, NC, USA

10 <sup>2</sup> Department of Family Medicine and Community Health, UMass Chan School of Medicine,  
11 Worcester, MA, USA

12 <sup>3</sup> Department of Surgery, Atrium Health Carolinas Medical Center, Charlotte, NC, USA

13 <sup>4</sup> Department of Biostatistics and Data Science, Wake Forest University School of Medicine,  
14 Winston-Salem, NC, USA

15 <sup>5</sup> Department of Emergency Medicine, University of California San Francisco Fresno School of  
16 Medicine, Fresno, CA, USA

17 <sup>6</sup> Department of Epidemiology and Prevention, Wake Forest University School of Medicine,  
18 Winston-Salem, NC, USA

19 <sup>7</sup> Department of Implementation Science, Wake Forest University School of Medicine, Winston-  
20 Salem, NC, USA

21 **Corresponding Author:**

22 Maxwell C. Messinger

23 Department of Family Medicine and Community Health

24 University of Massachusetts Chan School of Medicine

25 119 Belmont St

26 Worcester, MA 01605, USA

27 [Maxwell.messinger3@umassmed.edu](mailto:Maxwell.messinger3@umassmed.edu) Phone: (980) 234-8728

28 **Word Count:** 5993

29

30

1 **ABSTRACT**

2

3 **Background**

4 Emergent reperfusion by percutaneous coronary intervention (PCI) within 90 minutes of first  
5 medical contact (FMC) is indicated in patients with ST-segment elevation myocardial infarction  
6 (STEMI). However, long transport times in rural areas in the Southeast US make meeting this  
7 goal difficult. The objective of this study was to determine the number of Southeast US residents  
8 with prolonged transport times to the nearest 24/7 primary PCI (PPCI) center.

9

10 **Methods**

11 A cross-sectional study of residents in the Southeastern US was conducted based on  
12 geographical and 2022 5-Year American Community Survey data. The geographic information  
13 system (GIS) ArcGIS Pro was used to estimate Emergency Medical Services (EMS) transport  
14 times for Southeast US residents to the nearest PPCI center. All 24/7 PPCI centers in North  
15 Carolina, South Carolina, Georgia, Florida, Mississippi, Alabama, and Tennessee were included  
16 in the analysis, as well as nearby PPCI centers in surrounding states. To identify those at risk of  
17 delayed FMC-to-device time, the primary outcome was defined as a >30-minute transport time,  
18 beyond which most patients would not have PCI within 90 minutes. A secondary outcome was  
19 defined as transport >60 minutes, the point at which FMC-to-device time would be >120 minutes  
20 most of the time. These cutoffs are based on national median EMS scene times and door-to-  
21 device times.

22

23 **Results**

24 Within the Southeast US, we identified 62,880,528 residents and 350 PPCI centers. Nearly 11  
25 million people living in the Southeast US reside greater than 30 minutes from a PPCI center  
26 (17.3%, 10,866,710, +/- 58,143), with 2% (1,271,522 +/- 51,858) living greater than 60 minutes  
27 from a PPCI hospital. However, most patients reside in short transport zones; 82.7% (52,013,818  
28 +/- 98,741). Within the Southeast region, 8.4% (52/616) of counties have more than 50% of their  
29 population in a long transport zone and 42.3% (22/52) of those have more than 90% of their  
30 population in long transport areas.

31

32 **Conclusions**

33 Nearly 11 million people in the Southeast US do not have access to timely PCI for STEMI care.  
34 This disparity may contribute to increased morbidity and mortality.

35

36

## 1 INTRODUCTION

2 Timely percutaneous coronary intervention (PCI) is the standard treatment for ST-elevation  
3 myocardial infarction (STEMI) and is associated with improved morbidity and mortality. Every  
4 30-minute delay in reperfusion is associated with a 7.5% increase in one-year mortality.<sup>1</sup>  
5 American College of Cardiology Foundation/American Heart Association (ACCF/AHA)  
6 guidelines recommend that first medical contact (FMC)-to-device time be 90 minutes or less and,  
7 when PCI is not possible within 120 minutes of FMC, that fibrinolytic therapy be administered  
8 as early as possible.<sup>2,3</sup> Traditional measures to decrease time to reperfusion include emergency  
9 medical services (EMS) recognizing STEMI rapidly, minimizing scene time, and providing early  
10 notification and 12-lead electrocardiogram (ECG) transmission to receiving facilities.<sup>4-9</sup>

11  
12 While advances in STEMI care have led to decreased mortality rates in the US since the mid-  
13 1980s, those in urban areas have benefitted much more than their rural counterparts.<sup>10-13</sup> Rural  
14 residents have a 40% higher prevalence of cardiovascular disease (CVD) as well as higher CVD  
15 mortality – the so-called “rural mortality penalty.”<sup>12</sup> The effects of the urban-rural divide are  
16 most pronounced in the American South, especially in Appalachia and the Mississippi Delta  
17 region, where the lowest life expectancies and the highest CVD mortality rates in the country are  
18 found.<sup>10</sup> In response to this disparity, in 2020 the AHA announced a “Call to Action” to better  
19 understand challenges in rural cardiovascular care and to improve outcomes.<sup>14</sup>

20  
21 Patients living in rural areas, particularly those living more than a 30-minute drive from a  
22 primary PCI (PPCI) center are less likely to receive timely PCI. To better characterize this rural  
23 cardiovascular care disparity, this study aims to quantify the risk of delayed PCI in the

1 Southeastern US by estimating the population that would be likely to experience delayed PCI  
2 due to transport time to their nearest PPCI center. The primary objective was to quantify those  
3 residents who are unlikely to be able to receive PCI within 90 minutes of FMC. Secondary  
4 objectives were to 1) identify to what extent long transport times coincide with rural populations,  
5 2) quantify the proportion of residents who would be unlikely to receive PCI within 120 minutes  
6 of FMC, and 3) identify the counties that have greater than half of their population at high risk of  
7 an FMC-to-device time longer than 120 minutes. These findings will help identify where the  
8 population at risk of delayed PCI resides and may help inform healthcare policymakers and  
9 prehospital care protocols.

10

## 11 **METHODS**

### 12 *Study Design and Setting*

13 We conducted a cross-sectional study of all residents of the Southeast US. The Southeast US is  
14 defined here as North Carolina (NC), South Carolina (SC), Tennessee (TN), Georgia (GA),  
15 Florida (FL), Mississippi (MS), and Alabama (AL). The Strengthening the Reporting of  
16 Observational Studies in Epidemiology (STROBE) guidelines were used to direct the research  
17 and manuscript development processes.<sup>15</sup> The study was reviewed by the Wake Forest IRB and  
18 determined to be exempt.

19

### 20 *Patient Population*

21 The study includes all residents of the Southeast US identified using the 2022 5-year American  
22 Community Survey. In addition, the 5-year American Community Survey was also used to  
23 determine resident demographics, including their age, sex, and race. The American Community

1 Survey is a product of the US Census Bureau that estimates characteristics of the US population  
2 using a survey sent to a sample of the US population—roughly 3.5 million addresses across all 50  
3 states, the District of Columbia, and Puerto Rico. Responses collected across years are  
4 aggregated to generate 5-year estimates that have increased reliability, especially for sparsely  
5 populated areas and small population groups.<sup>16</sup>

6

### 7 *Transport Time Calculations*

8 Southeast US resident ground transport times to the nearest PPCI center were calculated using  
9 the Network Analyst toolkit within the geographic information service (GIS) system ArcGIS  
10 Pro.<sup>17</sup> This software calculates anticipated drive times by using road network maps and  
11 proprietary travel time estimation algorithms. Specifically, the Service Area tool was used to  
12 identify travel time zones to each PPCI center identified by the study. This tool uses a list of  
13 locations and identifies the outer boundary of an area, within which the locations can be reached  
14 within a specified time. The tool was configured to estimate the drive time of emergency  
15 vehicles in rural settings to the nearest PPCI center.

16

17 To assess the accuracy of the ArcGIS Network Analyst system methodology for estimating  
18 transport time, we also generated the 30- and 60-minute travel time zones using two other  
19 mapping software packages (Here and Mapbox using the *hereR* and *mapboxapi* packages).<sup>18–20</sup>  
20 We then used the outputs of each to generate independent estimates of the population at risk and  
21 characterized the variance based on the routing tool used. This analysis indicated that ArcGIS  
22 provides an estimate that is similar to other tools, with the ArcGIS-generated estimate of the  
23 population  $\geq 30$  minutes from PPCI falling between those of Here and Mapbox.

1 In addition, we compared the performance of our transport time calculation with both linear  
2 distance from a PPCI center and Rural-Urban Commuting Area (RUCA) code, a measure of how  
3 rural a census tract is based on population density, urbanization, and daily commuting as  
4 determined by the 2010 Decennial Census.<sup>21,22</sup> Each of these variables was used in univariate  
5 logistic regression, carried out in R, to determine how reliably they could predict whether a  
6 census tract would have a short (<30 minute) or long ( $\geq$ 30 minute) transport time.<sup>18,21</sup> Each  
7 census tract in the region was classified as a short or long transport tract based on the transport  
8 time to the tract centroid. A 75% sample of tracts in the Southeast US was used for training with  
9 the remaining 25% used for validation. Model performance was assessed by generating a  
10 confusion matrix and  $\kappa$ -statistic in the *caret* package.<sup>23,24</sup> These Logistic regression analyses  
11 demonstrated that our GIS-based calculations of transport time were superior to linear distance  
12 or RUCA code strategies in identifying long transport zones. Use of linear distance was similar  
13 to GIS-based transport time, but only identified 90% of long transport zones compared to GIS-  
14 based transport time. Performance of logistic regression using RUCA code as a predictor was  
15 poor compared to GIS-based transport analysis, especially in predicting long transport zones.  
16  
17 To stratify the risk of delayed PCI, transport times were categorized as short, long, and very long  
18 (<30, 30-60, >60 minutes, respectively). Transport time categories were based on a national  
19 EMS scene time in STEMI of 15 minutes and a national average door-to-balloon time (DBT) of  
20 45 minutes.<sup>25,26</sup> Thus, our transport time thresholds were chosen to identify the population that,  
21 when transported by ambulance, would be likely to meet the ACCF/AHA goal of PCI within 90  
22 minutes of FMC, those who will likely receive PCI within 120 minutes, and those who are  
23 unlikely to receive PCI within 120 minutes, when added to an average EMS scene time and DBT

1 (Figure 1).<sup>2</sup> For example, an EMS transport time of 30-60 minutes when added to an average  
2 scene and DBT time is likely to result in an FMC-to-device time of 90-120 minutes, indicating  
3 that these patients are unlikely to meet the 90 minute FMC-to-device time goal. A transport time  
4 >60 minutes when added to scene and DBT times is likely to result in an FMC-to-device time  
5 >120 minutes, the point at which ACCF/AHA guidelines recommend prioritizing early  
6 fibrinolytic therapy.<sup>2</sup>

7

### 8 *Rurality*

9 Rural areas were defined based on the Federal Office of Rural Health Policy (FORHP).<sup>22</sup> Rural  
10 counties and census tracts were used to determine the percentage of long-transport areas  
11 contained in rural areas as well as the percentage of rural areas that do not have a high risk of  
12 long transport. The degree of rurality for short and long-transport areas was also calculated using  
13 RUCA codes.<sup>21</sup>

14

### 15 *Primary PCI Center Identification*

16 The CathPCI Registry, published by the American College of Cardiology (ACC), was used to  
17 identify facilities performing PCI in the Southeast US.<sup>27,28</sup> This database relies on voluntary  
18 participation by cardiac catheterization labs (CCLs) but includes more than 90% of CCLs in the  
19 US.<sup>29</sup> To identify PCI centers that were available 24 hours a day and 7 days a week, the study  
20 team called each facility and spoke with the CCL staff using a standardized call script  
21 (Supplemental Appendix 1). Calls were made between June 2021 and April 2022. If CCL staff  
22 were unavailable, team members spoke with the emergency department charge nurse or  
23 attending emergency physician. Every CathPCI-registered CCL in the Southeast US was called.

1 Additionally, study team members called select nearby CCLs in surrounding states (Virginia,  
2 Kentucky, Missouri, Arkansas, and Louisiana) to determine if they were PPCI centers. Lastly,  
3 the number of PCI centers within FORHP-defined rural areas was calculated.

4

#### 5 *Delayed PCI Risk Analysis*

6 The total number of residents within each transport time category, along with the 95% margin of  
7 error, was estimated using the R Statistical Computing Environment, along with the *tidyverse*  
8 package and data from the 2022 5-year American Community Survey.<sup>18,30–32</sup> Population data at  
9 the census tract and block level were used to identify the population within each transport zone.  
10 To handle tracts that lie across multiple transport categories, a population-weighted interpolation  
11 method from the *tidycensus* package was used to assign a proportion of the tract’s population to  
12 each zone.<sup>33</sup> This approach uses the estimated population at a finer scale, in this case the block  
13 level, as a weight to assign a population to a subset of a larger geometry, in this case the tract.<sup>34</sup>  
14 The total population within each transport zone was then calculated along with the proportion of  
15 patients living <30 minutes from PPCI, 30-60 minutes from PPCI, and >60 minutes from PPCI.  
16 Patient demographics including age, sex, and race of the population residing within the Southeast  
17 US were summarized using descriptive statistics, and 95% margin of error was estimated using  
18 *tidycensus*.<sup>33</sup> Differences in these demographics between transport zones were evaluated using  
19 two-tailed z-tests as described in the American Community Survey guidance document.<sup>35</sup>

20

## 21 **RESULTS**

22 Within the Southeast US, we identified a total population of 62,880,528 +/- 102,975 people, of  
23 which 51.0% (32,062,915 +/- 62,809) were female, 63.6% (39,967,520 +/- 82,264) were white,



1 and 43.7% (27,459,924 +/- 52,606) were age 45 or older. We identified 350 PPCI centers within  
2 the Southeast US and 23 PPCI centers in adjacent states (Figure 2). Florida is home to the most  
3 PPCI centers in the region with 150 (42.9%) while Mississippi is home to the least with 22  
4 (6.3%). While most PPCI centers were in urban areas, 9.4% (33/350) were in FORHP-defined  
5 rural areas.

6  
7 Within the Southeast US population, 17.3% (10,866,710 +/- 58,143) had an estimated transport  
8 time to PPCI  $\geq$ 30 minutes, corresponding to a high likelihood of an FMC-device time  $>$ 90  
9 minutes. Among these patients, most have a transport time within 30-60 minutes, but 11.7%  
10 (1,271,522 +/- 51,858) reside  $>$ 60 minutes from the nearest PPCI center, which makes them  
11 unlikely to have an FMC-to-device within 120 minutes. Therefore, 2.0% (1,271,522 +/- 51,858)  
12 of the total population in the Southeast US is likely to have an FMC-to-device time of greater  
13 than 120 minutes. Within the Southeast US, 82.7% (52,013,818 +/- 98,741) of the population  
14 live less than 30 minutes from PPCI and are at low risk of delayed PCI due to geography (Table  
15 1).

16  
17 Among patients at risk of delayed PCI due to long or very long transport times, 71.0% are white  
18 (7,720,668 +/- 46,755) compared to 62.0% (32,246,852 +/- 78,267) in short transport zones  
19 ( $p < 0.0001$ ). We also found that the population in long transport areas is older, with 46.2%  
20 (5,022,498 +/- 49,455) of the population  $\geq$ 45 years old in long transport areas compared to  
21 43.1% (22,437,426 +/- 50,035) in short transport areas ( $p < 0.0001$ ).

22  
23 *Areas at Risk*

1 Long transport zones are distributed across the entire Southeast US and are present to varying  
2 degrees in every state (Figure 2). Areas with the longest transport times are in the mountains of  
3 NC, the NC coast, the FL panhandle, the FL keys, and portions of AL and MS (Figure 2).  
4 Transport times in some of these areas exceed two hours.

5  
6 Most counties in the Southeast US (56%, 346/616) have >50% of their population residing  
7 greater than 30 minutes from PPCI, indicating that most counties have a large amount of their  
8 population at risk of delayed PCI (Supplemental Figure 1). Further, there is a subset of counties  
9 (8.4%, 52/616) that have >50% of their population residing > 60 minutes from PPCI. Of those,  
10 42.3% (22/52) have more than 90% of their population living over 60 minutes from PPCI (Figure  
11 3).

### 13 *Rural Areas and Transport Times*

14 Most areas that are  $\geq 30$  minutes from PPCI in the Southeast US are contained within a rural area  
15 (85.6%). While long transport zones are mostly contained in rural areas, 37.7% of rural areas  
16 have transport times <30 minutes from PPCI (Supplemental Figure 2). Long transport zones are  
17 also likely to be more rural than short transport zones as determined by RUCA code. Short  
18 transport zones have a mean RUCA of 1.79 (SD 4.24) while long transport zones have a mean  
19 RUCA of 4.40 (SD 4.23). Those areas with a RUCA of 4 or higher are classified as rural by the  
20 FORHP, indicating that the average long transport area is rural according to the FORHP  
21 definition.

## 23 **DISCUSSION**

1 This is the first study to investigate the population at risk of delayed PCI in an entire  
2 geographical region. We found that nearly 11 million people in the Southeast US reside in long  
3 transport zones and are at high risk for delayed PCI. Of those, over 1.2 million people reside  
4 more than 60 minutes from PPCI, meaning that it is unlikely they would reach PCI within 120  
5 minutes of FMC when transported by ground. In these patients, alternative transports methods,  
6 such as helicopter EMS, or alternative interventions, such as prehospital fibrinolysis, should be  
7 considered. Additionally, we found that people in western NC, the NC coast, the FL Keys and  
8 Everglades, and some areas of AL would experience ground transport times greater than two  
9 hours, making delayed PCI almost certain. These findings suggest that novel care strategies and  
10 approaches are needed to ensure equitable cardiovascular care for this at-risk rural population.

11  
12 The present study is the first to use a GIS approach at a regional scale, as all previous studies  
13 have limited their scope to the state level. Our results are generally consistent with those studies  
14 investigating geographic limitations on access to PCI at the state level. Studies that examined  
15 geographic limitations on access to PCI in Alabama, Ohio, and Maine, found that there is an  
16 association between rural residency and delayed access to cardiac interventional services.<sup>36-38</sup>  
17 However, most of these studies were limited by the proxies for travel time that were used, such  
18 as linear distance to a PPCI center. Our data suggest that linear distance from tract centroids to  
19 PPCI predicts transport time well but, since this method collapses the geography of tracts to their  
20 centroids, it may not provide an adequate characterization of census tracts that extend across  
21 multiple transport time zones. This limitation may become more important in larger rural tracts,  
22 the largest of which in the Southeast US is 2,410 square km, or roughly 75% the size of Rhode

1 Island. Graves used a similar GIS approach to the one used in the present study, but this analysis  
2 was limited to a single state.<sup>38</sup>

3  
4 Our results add to a growing body of literature establishing an important rural care disparity for  
5 STEMI care. To address this disparity, policymakers need data to determine where the greatest  
6 needs exist for increased cardiovascular services. Most PPCI centers are mostly found in areas of  
7 high population density where they can expect sufficient volumes to support their operations.  
8 Studies have shown that while many PCI centers do not meet case volume targets, which may  
9 have a small adverse effect on outcomes, opening PCI centers does lead to an increase in rates of  
10 same-day PCI for acute coronary syndrome.<sup>39,40</sup> Knowing this, policymakers should determine  
11 whether PCI facilities can be located in areas of geographic need.

12  
13 In areas where adding PCI facilities is not feasible, there must be renewed efforts to ensure that  
14 patients can be transported rapidly across large distances and treated quickly upon arrival at a  
15 hospital. Prehospital ECG transmission and activation of the CCL before patient arrival, an  
16 approach adopted by many hospitals already, has been shown to reduce FMC-to-device time and  
17 decrease mortality.<sup>41,42</sup> Additionally, transport by helicopter emergency medical services  
18 (HEMS) could provide a reduction in transport time. In certain scenarios, HEMS has been shown  
19 to significantly reduce transport times, though this may not always lead to an FMC-to-device  
20 time <90 minutes.<sup>43-45</sup> The current study could aid EMS agencies in protocolizing HEMS as a  
21 transport mode for STEMI. Finally, early prehospital administration of fibrinolytic therapy or  
22 diversion to the closest fibrinolytic-capable emergency department may provide a solution in  
23 patients unlikely to receive PCI within 120 minutes. Prehospital fibrinolysis has been adopted in

1 many rural areas of the world and is seeing increased adoption in the US.<sup>46-48</sup> Further adoption of  
2 this approach may be facilitated through emerging technologies such as telemedicine.

3

#### 4 *Limitations*

5 The current study did not consider the use of air transport. This would reduce transport times, but  
6 HEMS availability is affected by factors such as inclement weather and a limited number of  
7 aircraft. As a result, our analysis provides useful information about what transport times can be  
8 achieved in any conditions. Estimates of ground transport time are also imperfect, although  
9 previous comparisons of ArcGIS analyses and documented real-world transport times indicate  
10 that the software tends to underestimate transport time by approximately 12 minutes when  
11 transport time exceeds 20 minutes.<sup>49</sup> Therefore, our results are likely a conservative estimate of  
12 the population at risk from long ground transport. Additionally, US Census data is subject to  
13 sampling bias and an incomplete survey response rate.<sup>50</sup> The area-weighted approach used to  
14 assign population estimates to block groups including multiple transport zones is also imperfect,  
15 as it assumes that the population is evenly distributed across each block group. We do not,  
16 however, expect that these assumptions would introduce a systematic bias in the results. For this  
17 study, we relied on the CathPCI registry to provide a list of facilities that perform PCI from  
18 which PPCI centers were identified. While the CathPCI registry does not include all CCLs in the  
19 country, it does include greater than 90% and we expect that participation among PPCI centers is  
20 likely to be higher than among all CCLs.<sup>29</sup> Regardless, some PPCI centers may not be included  
21 in the current study. We also relied on calls directly to facilities to identify PPCI centers and the  
22 knowledge of hospital staff. It is possible these methods underestimated or overestimated the  
23 number of PPCI centers.

1

## 2 **CONCLUSIONS**

3 Nearly 11 million people in the Southeast US are at risk of delayed PCI for STEMI. There are  
4 1.2 million residents of the Southeast US who live greater than 1 hour from PPCI. This  
5 cardiovascular care disparity places these patients at risk of increased morbidity and mortality  
6 from STEMI and intersects with other rural health disparities to contribute to worse CVD  
7 outcomes. Policymakers, health system leaders, and prehospital medical directors should use this  
8 information to help develop equitable care strategies regarding primary PCI center development  
9 and location, further optimization of door-to-device time for these patients, as well as novel  
10 prehospital care approaches, such as EMS-based fibrinolysis protocols and protocolized air  
11 transport for STEMI.

12

1 **Acknowledgments:** We thank those who made this project possible, especially Alex Ambrosini,  
2 Allison Perko, Ching-Hsuan Lin, Ian Kinney, Jake Nearine, Justin Holbrook, Mark Perez,  
3 Michael Chado, and Robert Ledbetter, who volunteered their time to collect the data on which  
4 the current study relies.

5 **Sources of Funding:** No funding was received for this project.

6 **Disclosures:**

7 Dr. Ashburn receives funding from NHLBI (K23HL169929) and AHRQ (R01HS029017).

8 Dr. Snavelly receives funding from Abbott Laboratories, NHLBI (K23HL169929), HRSA  
9 (1H2ARH399760100), and AHRQ (R01HS029017 and R21HS029234).

10 Dr. Stopyra receives research funding from NCATS/NIH (KL2TR001421), HRSA  
11 (H2ARH39976-01-00), Roche Diagnostics, Abbott Laboratories, Pathfast, Genetesis, Cytovale,  
12 Forest Devices, Vifor Pharma, and Chiesi Farmaceutici.

13 Dr. Mahler receives funding/support from Roche Diagnostics, Abbott Laboratories, QuidelOrtho,  
14 Siemens, Grifols, Pathfast, Beckman Coulter, Genetesis, Cytovale, National Foundation of  
15 Emergency Medicine, BlueJay Diagnostics, Duke Endowment, Brainbox, HRSA  
16 (1H2ARH399760100), and AHRQ (R01HS029017 and R21HS029234). He is a consultant for  
17 Roche, QuidelOrtho, Abbott, Siemens, Inflammatix, and Radiometer and is the Chief Medical  
18 Officer for Impathiq Inc.

19 **Previous Presentations:** Preliminary data were presented at Wake Forest Emergency Medicine  
20 E. Byrum Academic Forum in Winston-Salem, NC on April 20, 2022 and the Society for  
21 Academic Emergency Medicine Annual Meeting in Austin, TX on May 18, 2023.

22

## 1 REFERENCES

- 2 1. De Luca G, Suryapranata H, Ottervanger JP, Antman EM. Time Delay to Treatment and  
3 Mortality in Primary Angioplasty for Acute Myocardial Infarction. *Circulation* [Internet].  
4 2004 [cited 2023 May 16];109:1223–1225. Available from:  
5 <https://www.ahajournals.org/doi/abs/10.1161/01.CIR.0000121424.76486.20>
- 6 2. Anderson JL. 2013 ACCF/AHA guideline for the management of ST-elevation  
7 myocardial infarction: Executive summary: A report of the American College of  
8 Cardiology Foundation/American Heart Association Task Force on practice guidelines.  
9 *Circulation* [Internet]. 2013 [cited 2023 May 16];127:529–555. Available from:  
10 <https://www.ahajournals.org/doi/abs/10.1161/CIR.0b013e3182742c84>
- 11 3. Koul S, Andell P, Martinsson A, Gustav Smith J, van der Pals J, Scherstén F, Jernberg T,  
12 Lagerqvist B, Erlinge D. Delay from first medical contact to primary PCI and all-cause  
13 mortality: a nationwide study of patients with ST-elevation myocardial infarction. *J Am*  
14 *Heart Assoc* [Internet]. 2014 [cited 2023 May 16];3. Available from:  
15 <https://www.ahajournals.org/doi/abs/10.1161/JAHA.113.000486>
- 16 4. Studnek JR, Infinger A, Wilson H, Niess G, Jackson P, Swanson D. Decreased Time from  
17 9-1-1 Call to PCI among Patients Experiencing STEMI Results in a Decreased One Year  
18 Mortality. <https://doi.org/10.1080/1090312720181447621> [Internet]. 2018 [cited 2023  
19 May 16];22:669–675. Available from:  
20 <https://www.tandfonline.com/doi/abs/10.1080/10903127.2018.1447621>
- 21 5. Blankenship JC, Scott TD, Skelding KA, Haldis TA, Tompkins-Weber K, Sledgen MY,  
22 Donegan MA, Buckley JW, Sartorius JA, Hodgson JMB, Berger PB. Door-to-Balloon  
23 Times Under 90 Min Can Be Routinely Achieved for Patients Transferred for ST-Segment  
24 Elevation Myocardial Infarction Percutaneous Coronary Intervention in a Rural Setting. *J*  
25 *Am Coll Cardiol*. 2011;57:272–279.
- 26 6. Rasmussen DK, Washington A, Dougherty J, Fetcko L. Door-to-Balloon Time for  
27 Primary Percutaneous Coronary Intervention: How Does Northern West Virginia  
28 Compare? *J Emerg Med*. 2012;43:413–416.
- 29 7. Rasmussen MB, Frost L, Stengaard C, Brorholt-Petersen JU, Dodt KK, Søndergaard HM,  
30 Terkelsen CJ. Diagnostic performance and system delay using telemedicine for  
31 prehospital diagnosis in triaging and treatment of STEMI. *Heart* [Internet]. 2014 [cited  
32 2023 May 16];100:711–715. Available from: <https://heart.bmj.com/content/100/9/711>
- 33 8. Brunetti ND, Dellegrottaglie G, Lopriore C, Di Giuseppe G, De Gennaro L, Lanzone S, Di  
34 Biase M. Prehospital Telemedicine Electrocardiogram Triage for a Regional Public  
35 Emergency Medical Service: Is It Worth It? A Preliminary Cost Analysis. *Clin Cardiol*  
36 [Internet]. 2014 [cited 2023 May 16];37:140–145. Available from:  
37 <https://onlinelibrary.wiley.com/doi/full/10.1002/clc.22234>
- 38 9. Sørensen JT, Terkelsen CJ, Nørgaard BL, Trautner S, Hansen TM, Bøtker HE, Lassen JF,  
39 Andersen HR. Urban and rural implementation of pre-hospital diagnosis and direct  
40 referral for primary percutaneous coronary intervention in patients with acute ST-



- 1 elevation myocardial infarction. *Eur Heart J* [Internet]. 2011 [cited 2023 May  
2 16];32:430–436. Available from:  
3 <https://academic.oup.com/eurheartj/article/32/4/430/440509>
- 4 10. Singh GK, Siahpush M. Widening rural-urban disparities in all-cause mortality and  
5 mortality from major causes of death in the USA, 1969-2009. *J Urban Health* [Internet].  
6 2014 [cited 2023 May 16];91:272–292. Available from:  
7 <https://pubmed.ncbi.nlm.nih.gov/24366854/>
- 8 11. Singh GK, 1ψ ;, Azuine RE, Siahpush M, Williams SD. Widening Geographical  
9 Disparities in Cardiovascular Disease Mortality in the United States, 1969-2011. *Int J*  
10 *MCH AIDS* [Internet]. 2015 [cited 2023 May 16];3:134. Available from:  
11 </pmc/articles/PMC5005988/>
- 12 12. Miller CE, Vasani RS. The southern rural health and mortality penalty: A review of  
13 regional health inequities in the United States. *Soc Sci Med* [Internet]. 2021 [cited 2023  
14 May 16];268. Available from: <https://pubmed.ncbi.nlm.nih.gov/33137680/>
- 15 13. James W, Cossman JS. Long-Term Trends in Black and White Mortality in the Rural  
16 United States: Evidence of a Race-Specific Rural Mortality Penalty. *J Rural Health*  
17 [Internet]. 2017 [cited 2023 May 16];33:21–31. Available from:  
18 <https://pubmed.ncbi.nlm.nih.gov/27062224/>
- 19 14. Harrington RA, Califf RM, Balamurugan A, Brown N, Benjamin RM, Braund WE, Hipp  
20 J, Konig M, Sanchez E, Joynt Maddox KE. Call to Action: Rural Health: A Presidential  
21 Advisory From the American Heart Association and American Stroke Association.  
22 *Circulation* [Internet]. 2020 [cited 2023 May 16];141:E615–E644. Available from:  
23 <https://www.ahajournals.org/doi/abs/10.1161/CIR.0000000000000753>
- 24 15. Elm E von, Altman DG, Egger M, Pocock SJ, Gøtzsche PC, Vandenbroucke JP.  
25 Strengthening the reporting of observational studies in epidemiology (STROBE)  
26 statement: guidelines for reporting observational studies. *BMJ* [Internet]. 2007 [cited 2023  
27 May 16];335:806–808. Available from: <https://www.bmj.com/content/335/7624/806>
- 28 16. Understanding and Using American Community Survey Data: What All Data Users Need  
29 to Know. Washington, DC: 2020.
- 30 17. Esri Inc. ArcGIS Pro [Internet]. 2023 [cited 2024 Mar 31];Available from:  
31 <https://www.esri.com/en-us/arcgis/products/arcgis-pro/overview>
- 32 18. R Core Team. R: A Language and Environment for Statistical Computing [Internet]. 2023  
33 [cited 2024 Mar 31];Available from: <https://www.R-project.org/>
- 34 19. Unterfinger M. hereR: 'sf'-Based Interface to the "HERE" REST APIs [Internet]. 2023  
35 [cited 2024 Mar 31];Available from: <https://CRAN.R-project.org/package=hereR>
- 36 20. Walker K. mapboxapi: R Interface to "Mapbox" Web Services [Internet]. 2023 [cited  
37 2024 Mar 31];Available from: <https://CRAN.R-project.org/package=mapboxapi>
- 38 21. USDA ERS - Rural-Urban Commuting Area Codes [Internet]. [cited 2023 Jun  
39 7];Available from: [https://www.ers.usda.gov/data-products/rural-urban-commuting-area-](https://www.ers.usda.gov/data-products/rural-urban-commuting-area-codes.aspx)  
40 [codes.aspx](https://www.ers.usda.gov/data-products/rural-urban-commuting-area-codes.aspx)

- 1 22. Defining Rural Population | HRSA [Internet]. [cited 2023 Jun 7]; Available from:  
2 <https://www.hrsa.gov/rural-health/about-us/what-is-rural>
- 3 23. Kuhn M. Building Predictive Models in R Using the caret Package. *J Stat Softw.* 2008;28.
- 4 24. Jackman S. pscl: Classes and Methods for R Developed in the Political Science  
5 Computational Laboratory [Internet]. 2024 [cited 2024 Mar 31]; Available from:  
6 <https://github.com/atahk/pscl/>
- 7 25. Mission: Lifeline® Data Through The Years (2010 - 2016) [Internet]. American Heart  
8 Association. [cited 2023 May 21]; Available from:  
9 [https://www.heart.org/en/professional/quality-improvement/mission-lifeline/mission-](https://www.heart.org/en/professional/quality-improvement/mission-lifeline/mission-lifeline-data)  
10 [lifeline-data](https://www.heart.org/en/professional/quality-improvement/mission-lifeline/mission-lifeline-data)
- 11 26. Stopyra JP, Crowe RP, Snavely AC, Supples MW, Page N, Smith Z, Ashburn NP, Foley  
12 K, Miller CD, Mahler SA. Prehospital Time Disparities for Rural Patients with Suspected  
13 STEMI. *Prehospital emergency care* [Internet]. 2023 [cited 2023 May 16];27. Available  
14 from: <https://pubmed.ncbi.nlm.nih.gov/35380911/>
- 15 27. Brindis RG, Fitzgerald S, Anderson HV, Shaw RE, Weintraub WS, Williams JF. The  
16 American College of Cardiology-National Cardiovascular Data Registry™ (ACC-  
17 NCDR™): building a national clinical data repository. *J Am Coll Cardiol* [Internet]. 2001  
18 [cited 2023 Jun 8];37:2240–2245. Available from:  
19 [https://www.jacc.org/doi/10.1016/S0735-1097\(01\)01372-9](https://www.jacc.org/doi/10.1016/S0735-1097(01)01372-9)
- 20 28. Weintraub WS, McKay CR, Riner RN, Ellis SG, Frommer PL, Carmichael DB,  
21 Hammermeister KE, Effros MN, Bost JE, Bodycombe DP. The American College of  
22 Cardiology National Database: Progress and challenges. *J Am Coll Cardiol* [Internet].  
23 1997 [cited 2023 Jun 8];29:459–465. Available from:  
24 <https://pubmed.ncbi.nlm.nih.gov/9015006/>
- 25 29. Moussa I, Hermann A, Messenger JC, Dehmer GJ, Weaver WD, Rumsfeld JS, Masoudi  
26 FA. The NCDR CathPCI Registry: a US national perspective on care and outcomes for  
27 percutaneous coronary intervention. *Heart* [Internet]. 2013 [cited 2023 Jun 8];99:297–303.  
28 Available from: <https://heart.bmj.com/content/99/5/297>
- 29 30. Wickham H, Averick M, Bryan J, Chang W, McGowan L, François R, Golemund G,  
30 Hayes A, Henry L, Hester J, Kuhn M, Pedersen T, Miller E, Bache S, Müller K, Ooms J,  
31 Robinson D, Seidel D, Spinu V, Takahashi K, Vaughan D, Wilke C, Woo K, Yutani H.  
32 Welcome to the Tidyverse. *J Open Source Softw.* 2019;4:1686.
- 33 31. US Census Bureau. B01001: Sex By Age [Internet]. 2008-2022 American Community  
34 Survey 5-Year Estimates. 2023 [cited 2024 Mar 31]; Available from:  
35 [https://data.census.gov/table/ACS5Y2020.B01001?q=B01001&g=010XX00US\\$16000](https://data.census.gov/table/ACS5Y2020.B01001?q=B01001&g=010XX00US$1600000)  
36 [00](https://data.census.gov/table/ACS5Y2020.B01001?q=B01001&g=010XX00US$1600000)
- 37 32. US Census Bureau. B02001: Race [Internet]. 2018-2022 American Community Survey 5-  
38 Year Estimates. 2023 [cited 2024 Mar 31]; Available from:  
39 <https://data.census.gov/table/ACS1Y2022.B02001?t=Race+and+Ethnicity>

- 1 33. Walker K, Herman M. tidy census: Load US Census Boundary and Attribute Data as  
2 “tidyverse” and ‘sf’-Ready Data Frames [Internet]. 2024 [cited 2024 Mar 31]; Available  
3 from: <https://CRAN.R-project.org/package=tidy census>
- 4 34. Walker K. 7.3.2: Population-weighted areal interpolation. In: *Analyzing US Census Data: Methods, Maps, and Models in R*. Boca Raton, FL: Chapman & Hall/CRC Press; 2023.
- 5 35. Instructions for Applying Statistical Testing to American Community Survey Data  
6 [Internet]. Washington, DC: 2020 [cited 2024 Apr 10]. Available from:  
7 [https://www2.census.gov/programs-](https://www2.census.gov/programs-surveys/acs/tech_docs/statistical_testing/2020_Instructions_for_Stat_Testing_ACS.pdf)  
8 [surveys/acs/tech\\_docs/statistical\\_testing/2020\\_Instructions\\_for\\_Stat\\_Testing\\_ACS.pdf](https://www2.census.gov/programs-surveys/acs/tech_docs/statistical_testing/2020_Instructions_for_Stat_Testing_ACS.pdf)
- 9 36. Rhudy JP, Alexandrov AW, Hyrkäs KE, Jablonski-Jaudon RA, Pryor ER, Wang HE,  
10 Bakitas MA. Geographic access to interventional cardiology services in one rural state.  
11 *Heart Lung* [Internet]. 2016 [cited 2023 May 17];45:434–440. Available from:  
12 <https://pubmed.ncbi.nlm.nih.gov/27493022/>
- 13 37. Yamashita T, Kunkel SR. The association between heart disease mortality and geographic  
14 access to hospitals: county level comparisons in Ohio, USA. *Soc Sci Med* [Internet]. 2010  
15 [cited 2023 May 17];70:1211–1218. Available from:  
16 <https://pubmed.ncbi.nlm.nih.gov/20138417/>
- 17 38. Graves BA. Geographic analysis of cardiac interventional services in Alabama. *J*  
18 *Cardiovasc Nurs* [Internet]. 2011 [cited 2023 May 17];26:E1–E11. Available from:  
19 <https://pubmed.ncbi.nlm.nih.gov/21076313/>
- 20 39. Fanaroff AC, Zakrojsky P, Dai D, Wojdyla D, Sherwood MW, Roe MT, Wang TY,  
21 Peterson ED, Gurm HS, Cohen MG, Messenger JC, Rao S V. Outcomes of PCI in  
22 Relation to Procedural Characteristics and Operator Volumes in the United States. *J Am*  
23 *Coll Cardiol* [Internet]. 2017 [cited 2023 May 21];69:2913–2924. Available from:  
24 <https://www.jacc.org/doi/10.1016/j.jacc.2017.04.032>
- 25 40. Shen Y-C, Krumholz HM, Hsia RY. Do PCI Facility Openings and Closures Affect AMI  
26 Outcomes Differently in High- vs Average-Capacity Markets? *JACC Cardiovasc Interv*  
27 [Internet]. 2023 [cited 2023 May 21];16:1129–1140. Available from:  
28 <https://linkinghub.elsevier.com/retrieve/pii/S1936879823004818>
- 29 41. Shavadia JS, Roe MT, Chen AY, Lucas J, Fanaroff AC, Kochar A, Fordyce CB, Jollis JG,  
30 Tamis-Holland J, Henry TD, Bagai A, Kontos MC, Granger CB, Wang TY. Association  
31 Between Cardiac Catheterization Laboratory Pre-Activation and Reperfusion Timing  
32 Metrics and Outcomes in Patients With ST-Segment Elevation Myocardial Infarction  
33 Undergoing Primary Percutaneous Coronary Intervention: A Report From the ACTION  
34 Registry. *JACC Cardiovasc Interv* [Internet]. 2018 [cited 2023 May 17];11:1837–1847.  
35 Available from: <https://www.jacc.org/doi/10.1016/j.jcin.2018.07.020>
- 36 42. Kontos MC, Gunderson MR, Zegre-Hemsey JK, Lange DC, French WJ, Henry TD,  
37 McCarthy JJ, Corbett C, Jacobs AK, Jollis JG, Manoukian S V., Suter RE, Travis DT,  
38 Garvey JL. Prehospital Activation of Hospital Resources (PreAct) ST-Segment–Elevation  
39 Myocardial Infarction (STEMI): A Standardized Approach to Prehospital Activation and  
40

- 1 Direct to the Catheterization Laboratory for STEMI Recommendations From the  
2 American Heart Association’s Mission: Lifeline Program. *J Am Heart Assoc* [Internet].  
3 2020 [cited 2023 May 17];9. Available from:  
4 <https://www.ahajournals.org/doi/abs/10.1161/JAHA.119.011963>
- 5 43. Knudsen L, Stengaard C, Hansen T, Lassen J, Terkelsen C. Earlier reperfusion in patients  
6 with ST-elevation Myocardial infarction by use of helicopter. *Scand J Trauma Resusc*  
7 *Emerg Med*. 2012;20:70.
- 8 44. Huang RL, Thomasse EJ, Park JY, Scott C, Maron DJ, Fredi JL. Clinical Pathway:  
9 helicopter scene STEMI protocol to facilitate long-distance transfer for primary PCI.  
10 *Critical Pathways in Cardiology: A Journal of Evidence-Based Medicine*. 2012;11:193–  
11 198.
- 12 45. McMullan JT, Hinckley W, Bentley J, Davis T, Fermann GJ, Gunderman M, Hart KW,  
13 Knight WA, Lindsell CJ, Miller C, Shackelford A, Brian Gibler W. Ground Emergency  
14 Medical Services Requests for Helicopter Transfer of ST-segment Elevation Myocardial  
15 Infarction Patients Decrease Medical Contact to Balloon Times in Rural and Suburban  
16 Settings. *Academic Emergency Medicine*. 2012;19:153–160.
- 17 46. Welsh RC, Goldstein P, Adgey J, Verheugt F, Bestilny SA, Wallentin L, Werf F Van de,  
18 Armstrong PW. Variations in pre-hospital fibrinolysis process of care: Insights from the  
19 assessment of the safety and efficacy of a new thrombolytic 3 plus international acute  
20 myocardial infarction pre-hospital care survey. *European Journal of Emergency Medicine*  
21 [Internet]. 2004 [cited 2023 May 17];11:134–140. Available from:  
22 [https://journals.lww.com/euro-](https://journals.lww.com/euro-emergencymed/Fulltext/2004/06000/Variations_in_pre_hospital_fibrinolysis_process_of_4.aspx)  
23 [emergencymed/Fulltext/2004/06000/Variations\\_in\\_pre\\_hospital\\_fibrinolysis\\_process\\_of\\_](https://journals.lww.com/euro-emergencymed/Fulltext/2004/06000/Variations_in_pre_hospital_fibrinolysis_process_of_4.aspx)  
24 [4.aspx](https://journals.lww.com/euro-emergencymed/Fulltext/2004/06000/Variations_in_pre_hospital_fibrinolysis_process_of_4.aspx)
- 25 47. Sayah AJ, Roe MT. The Role of Fibrinolytics in the Prehospital Treatment of ST-  
26 Elevation Myocardial Infarction (STEMI). *J Emerg Med*. 2008;34:405–416.
- 27 48. Crowder JS, Hubble MW, Gandhi S, McGinnis H, Zelman S, Bozeman W, Winslow J.  
28 Prehospital administration of tenecteplase for ST-segment elevation myocardial infarction  
29 in a rural EMS system. *Prehospital emergency care* [Internet]. 2011 [cited 2023 May  
30 17];15:499–505. Available from: <https://pubmed.ncbi.nlm.nih.gov/21815730/>
- 31 49. Wallace DJ, Kahn JM, Angus DC, Martin-Gill C, Callaway CW, Rea TD, Chhatwal J,  
32 Kurland K, Seymour CW. Accuracy of Prehospital Transport Time Estimation. *Acad*  
33 *Emerg Med* [Internet]. 2014 [cited 2023 May 17];21:9. Available from:  
34 [/pmc/articles/PMC4251659/](https://pubmed.ncbi.nlm.nih.gov/251659/)
- 35 50. Hill C, Heim K, Hong J, Phan N. Census Coverage Estimates for People in the United  
36 States by State and Census Operations 2020 Post-Enumeration Survey Estimation Report.  
37 2022.
- 38  
39  
40

1 **TABLES**

2 **Table 1:** Demographic and socioeconomic characteristics of residents of the Southeast US. All  
3 data collected from the 2020 5-Year American Community Survey. Parentheses contain 95%  
4 margin of error estimate.

|                  | <b>Southeast US</b>  | <b>≤30 Minute Transport</b> | <b>&gt;30 Minute Transport</b> |
|------------------|----------------------|-----------------------------|--------------------------------|
| Total Population | 62,880,528 (102,975) | 52,013,818 (98,741)         | 10,866,710 (58,143)            |
| <b>Race</b>      |                      |                             |                                |
| White            | 39,967,520 (82,264)  | 32,246,852 (78,267)         | 7,720,668 (46,755)             |
| Non-White        | 27,754,410 (99,221)  | 24,093,141 (96,705)         | 3,661,269 (96,703)             |
| <b>Sex</b>       |                      |                             |                                |
| Female           | 32,062,915 (62,809)  | 26,625,963 (60,239)         | 5,436,952 (32,892)             |
| <b>Age</b>       |                      |                             |                                |
| <25              | 19,261,074 (51,543)  | 15,983,749 (49,176)         | 3,277,325 (48,900)             |
| 25-44            | 16,159,530 (45,102)  | 13,592,642 (43,180)         | 2,566,888 (42,883)             |
| 45-64            | 16,198,293 (41,416)  | 13,305,734 (39,460)         | 2,892,559 (39,071)             |
| ≥65              | 11,261,631 (32,437)  | 9,131,693 (30,764)          | 2,129,938 (30,319)             |

5

6

1 **FIGURES**

2

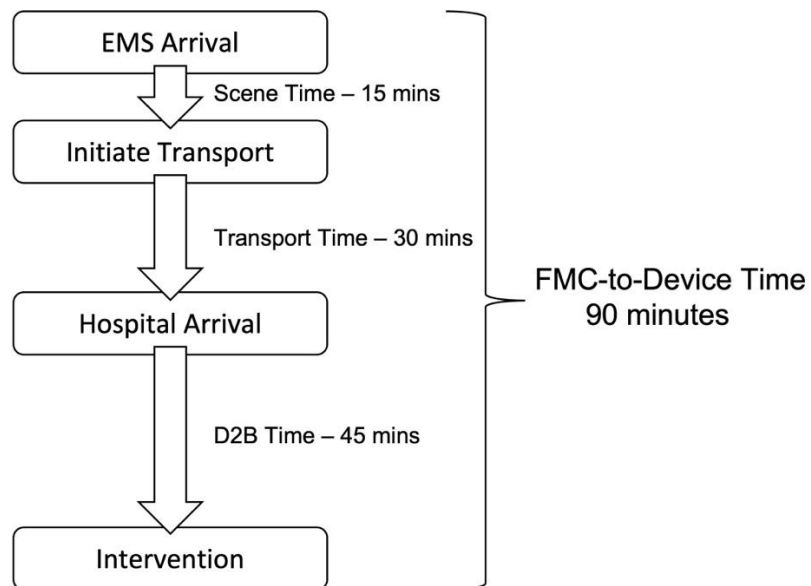

3

4 **Figure 1:** The components of first medical contact (FMC)-to-device time. The 30- and 60-minute  
5 transport time cut points were selected based upon a 15-minute scene time and a 45-minute  
6 door-to-balloon (D2B) time.

7

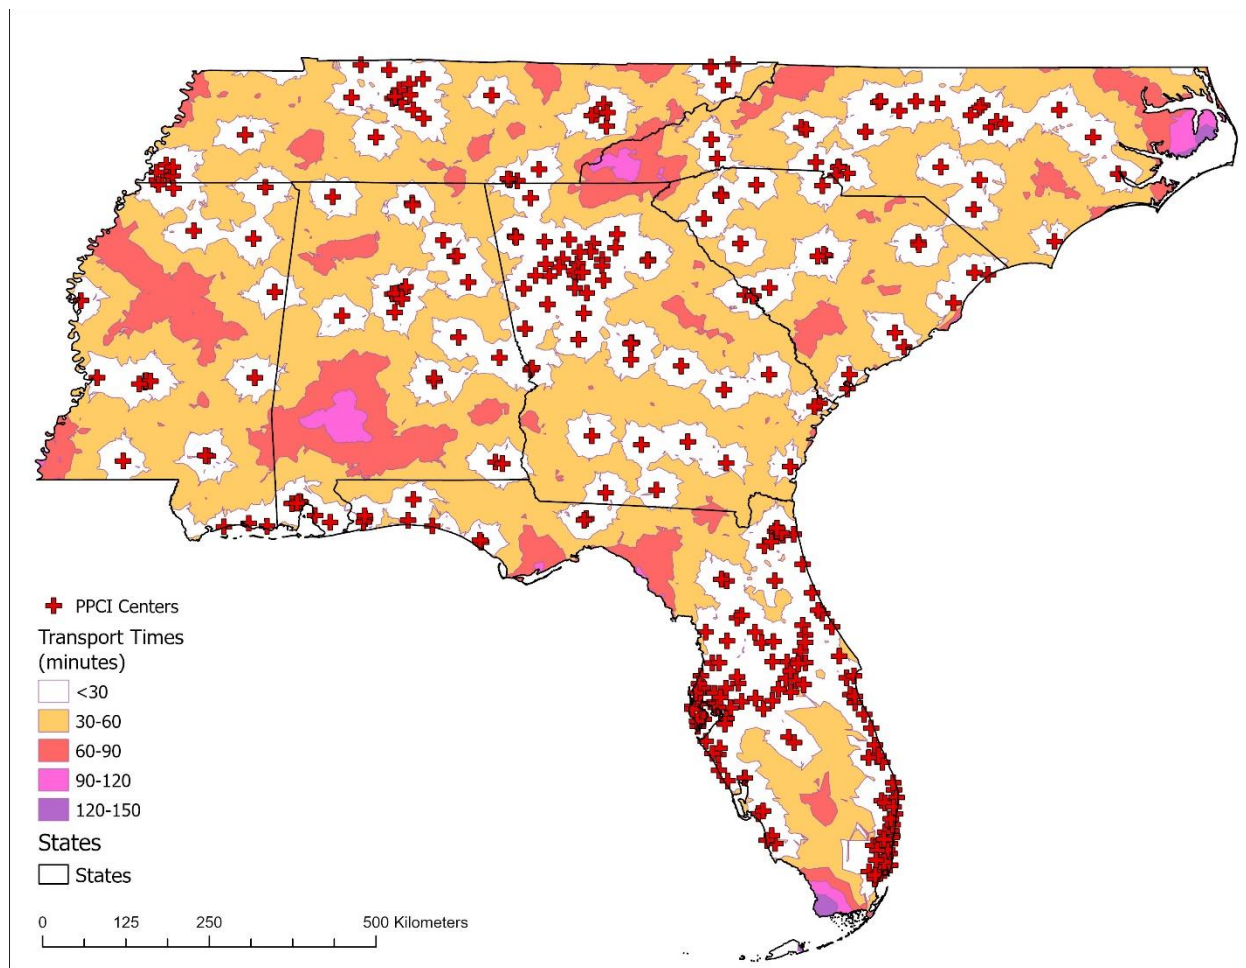

1  
2 **Figure 2:** Primary percutaneous coronary intervention (PPCI) centers and transport time zones in  
3 the Southeast US. Five different transport time regions are shown, demonstrating the range of  
4 transport times that exist within the region.  
5

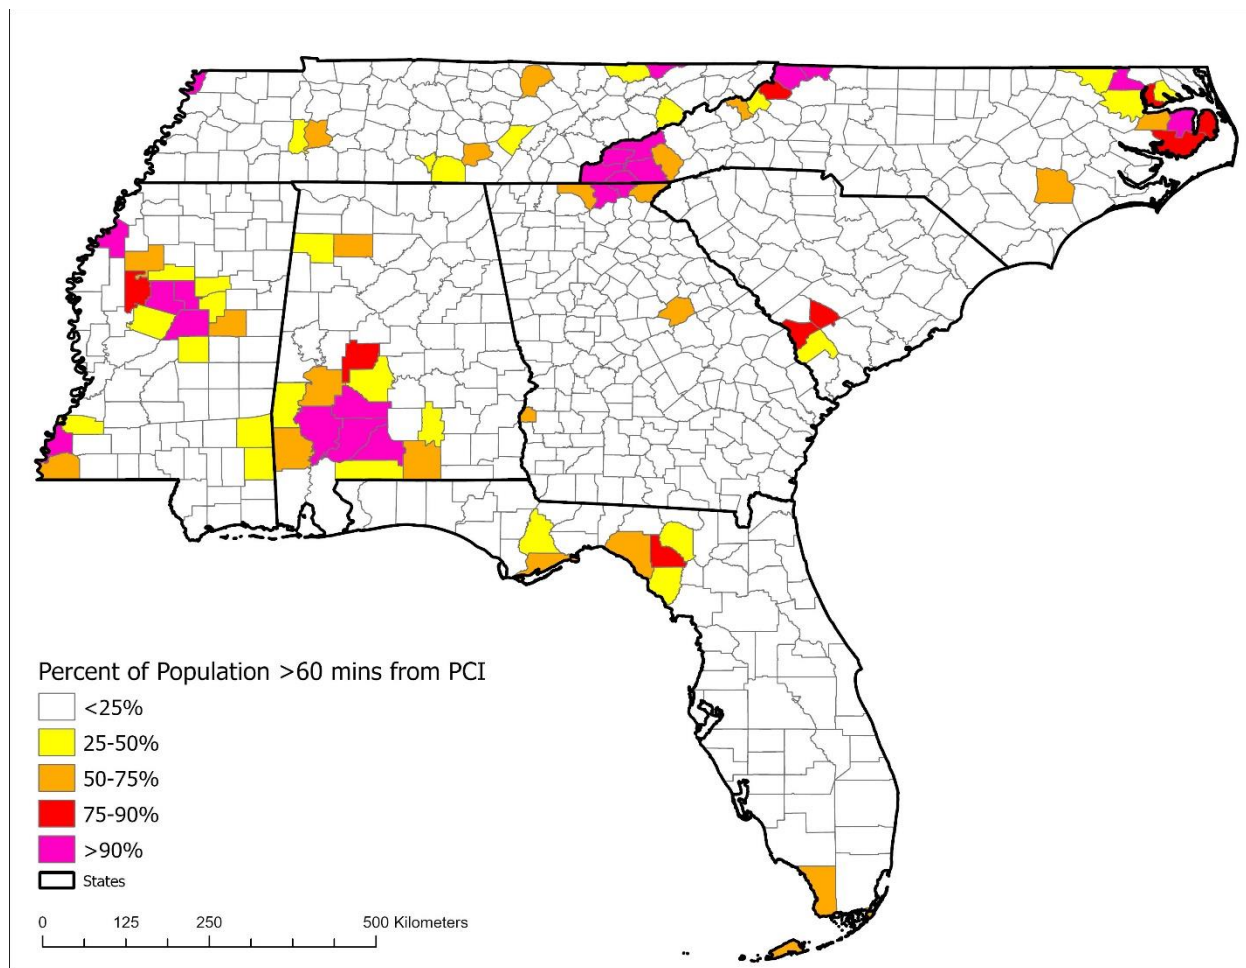

1  
2 **Figure 3:** Counties of the Southeastern US by the proportion of the population that resides  
3 greater than 60 minutes from a primary percutaneous coronary intervention (PCI) center. Those  
4 living greater than 60-minute from primary PCI are unlikely to receive intervention within 120  
5 minutes of first medical contact (FMC).  
6
